# Supplementary material for: Three-Dimensional Porous PVDF Foam Imprinted Membranes with High Flux and Selectivity toward Artemisinin/Artemether
Source: MDPI journal article supplement (doi:10.3390/molecules28217452), 2023-11-06
Supplement: s1 [file s1]

# **Three-Dimensional Porous PVDF Foam Imprinted Membranes with High Flux and Selectivity toward Artemisinin/Artemether**

**Weibai Bian <sup>1,2,3,\*</sup>, Ruixuan Zhang <sup>1</sup>, Xiaohui Chen <sup>1</sup>, Chuanxun Zhang <sup>2</sup> and Minjia Meng <sup>2,\*</sup>**

<sup>1</sup> School of Photoelectric Engineering, Changzhou Institute of Technology, Changzhou 213032, China

<sup>2</sup> School of Chemistry and Chemical Engineering, Jiangsu University, Zhenjiang 212013, China

<sup>3</sup> Tianhe Pharmaceutical Co., Ltd., Yangzhou 225267, China

\* Correspondence: bianwb@czu.cn (W.B.); mmj@ujs.edu.cn (M.M.)

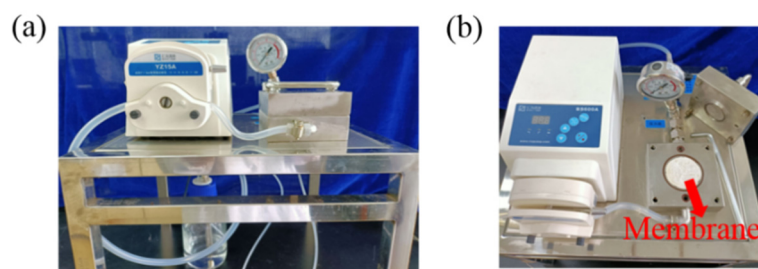

**Figure S1.** Physical image of low-pressure flat membrane cross-flow device with front view (a) and top view (b).

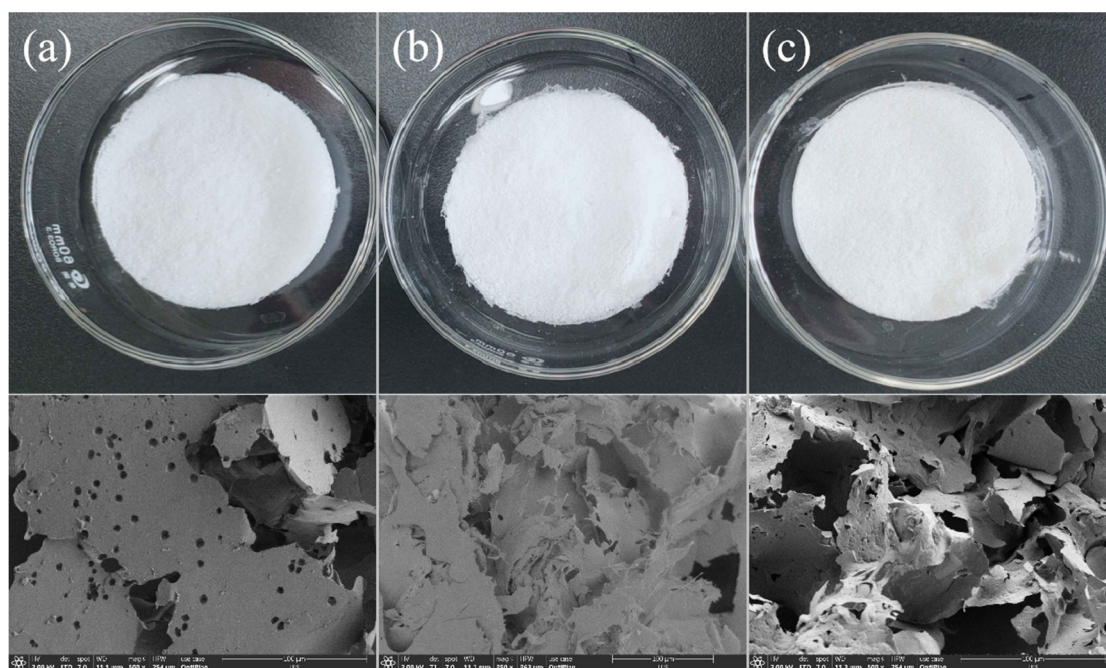

**Figure S2.** The physical map and SEM images of the three different foam PVDF membrane with the varied dosage of PVDF powder and sodium chloride particles (the mass ratios were 1:6 (a), 1:7 (b) and 1:8 (c)).

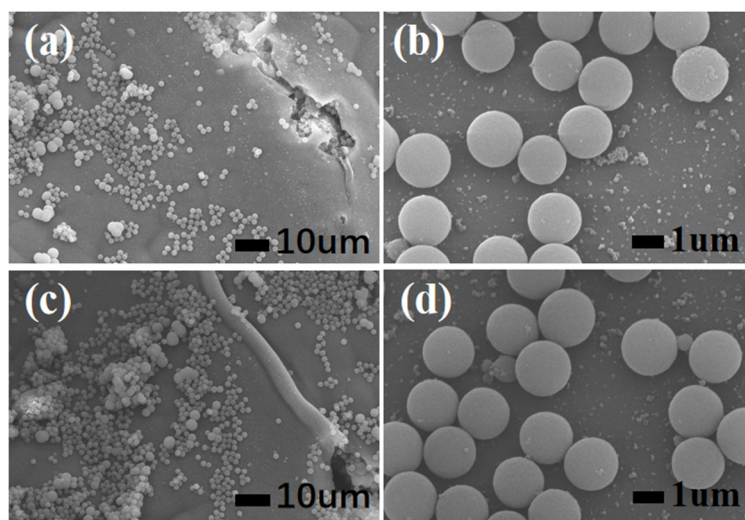

**Figure S3.** SEM surface images of PPIM (a,b) and PPNM(c,d) with the different magnifications.

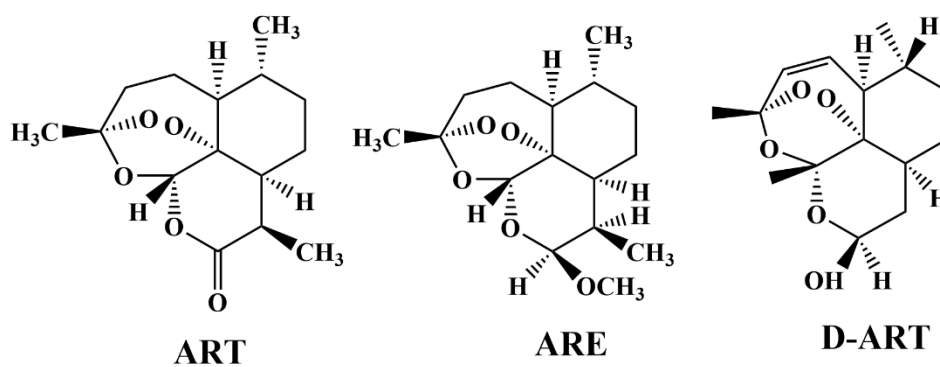

**Figure S4.** The molecular structure of ART and ARE and D-ART
